# Supplementary material
Source: PubMed Central journal article supplement (PMC7177194)
Supplement: NIHMS1068900-supplement-supplemental_material.pdf [file NIHMS1068900-supplement-supplemental_material.pdf]

State Variability in Diagnosed Conditions for IDEA Part C Eligibility  
 Online Supplement

Table 1. 71 Diagnosed conditions and their estimated prevalence found on 10 or more state, District of Columbia, and territory lists of conditions conferring automatic eligibility for IDEA Part C Early Intervention Services

| Condition                              | Estimated relative prevalence category | No. states | Reference                                                                                                                                                                                                                                                                                                                                                           |
|----------------------------------------|----------------------------------------|------------|---------------------------------------------------------------------------------------------------------------------------------------------------------------------------------------------------------------------------------------------------------------------------------------------------------------------------------------------------------------------|
| Hearing Impairment                     | Common                                 | 38         | <a href="http://www.cdc.gov/ncbddd/hearingloss/data.html">http://www.cdc.gov/ncbddd/hearingloss/data.html</a>                                                                                                                                                                                                                                                       |
| Fetal Alcohol Syndrome                 | Common                                 | 34         | <a href="http://www.cdc.gov/ncbddd/fasd/data.html#ref">http://www.cdc.gov/ncbddd/fasd/data.html#ref</a>                                                                                                                                                                                                                                                             |
| Down Syndrome                          | Common                                 | 32         | <a href="http://www.cdc.gov/ncbddd/birthdefects/features/key-findings-Down-Syndrome-Prevalence.html">http://www.cdc.gov/ncbddd/birthdefects/features/key-findings-Down-Syndrome-Prevalence.html</a>                                                                                                                                                                 |
| Vision Impairment                      | Common                                 | 29         | <a href="http://www.who.int/bulletin/archives/79(3)227.pdf">http://www.who.int/bulletin/archives/79(3)227.pdf</a>                                                                                                                                                                                                                                                   |
| Cerebral Palsy                         | Common                                 | 27         | <a href="http://www.cdc.gov/ncbddd/cp/data.html#references">http://www.cdc.gov/ncbddd/cp/data.html#references</a>                                                                                                                                                                                                                                                   |
| Fragile X Syndrome                     | Rare                                   | 26         | <a href="http://www.cdc.gov/ncbddd/fxs/data.html">http://www.cdc.gov/ncbddd/fxs/data.html</a>                                                                                                                                                                                                                                                                       |
| Autism Spectrum Disorder               | Very Common                            | 25         | <a href="http://www.cdc.gov/ncbddd/autism/data.html">http://www.cdc.gov/ncbddd/autism/data.html</a>                                                                                                                                                                                                                                                                 |
| Waardenburg Syndrome, Types I and II   | Very Rare                              | 24         | <a href="https://www.rarediseases.org/rare-disease-information/rare-diseases/byID/430/viewFullReport">https://www.rarediseases.org/rare-disease-information/rare-diseases/byID/430/viewFullReport</a>                                                                                                                                                               |
| Intraventricular Hemorrhage            | Unknown                                | 22         | <a href="http://ac.els-cdn.com/S0887899408004803/1-s2.0-S0887899408004803-main.pdf?_tid=f59ee73a-cbec-11e4-bfbf-00000aacb360&amp;acdnat=1426518112_f05f05aa36c7714bf3c5e7ca23d6307f">http://ac.els-cdn.com/S0887899408004803/1-s2.0-S0887899408004803-main.pdf?_tid=f59ee73a-cbec-11e4-bfbf-00000aacb360&amp;acdnat=1426518112_f05f05aa36c7714bf3c5e7ca23d6307f</a> |
| Cleft Palate with or without Cleft Lip | Rare                                   | 22         | <a href="http://www.cdc.gov/ncbddd/birthdefects/features/birthdefects-keyfindings.html">http://www.cdc.gov/ncbddd/birthdefects/features/birthdefects-keyfindings.html</a>                                                                                                                                                                                           |
| Tuberous Sclerosis Complex             | Rare                                   | 22         | <a href="http://www.sciencedirect.com/science/article/pii/S0140673608612799">http://www.sciencedirect.com/science/article/pii/S0140673608612799</a>                                                                                                                                                                                                                 |
| Trisomy 18 (Edwards Syndrome)          | Rare                                   | 22         | <a href="http://www.cdc.gov/ncbddd/birthdefects/features/birthdefects-keyfindings.html">http://www.cdc.gov/ncbddd/birthdefects/features/birthdefects-keyfindings.html</a>                                                                                                                                                                                           |
| Hydrocephalus                          | Rare                                   | 21         | <a href="http://www.ncbi.nlm.nih.gov/pubmed/16188776">http://www.ncbi.nlm.nih.gov/pubmed/16188776</a>                                                                                                                                                                                                                                                               |

| Condition                  | Estimated relative prevalence category | No. states | Reference                                                                                                                                                                                                         |
|----------------------------|----------------------------------------|------------|-------------------------------------------------------------------------------------------------------------------------------------------------------------------------------------------------------------------|
| Prematurity                | Very Common                            | 21         | <a href="http://mchb.hrsa.gov/chusa13/perinatal-health-status-indicators/p/preterm-birth.html">http://mchb.hrsa.gov/chusa13/perinatal-health-status-indicators/p/preterm-birth.html</a>                           |
| Holoprosencephaly          | Very Rare                              | 21         | <a href="https://ojrd.biomedcentral.com/articles/10.1186/1750-1172-2-8">https://ojrd.biomedcentral.com/articles/10.1186/1750-1172-2-8</a>                                                                         |
| Attachment Disorders       | Very Common                            | 20         | <a href="http://www.attachmentdisordermaryland.com/intro.htm">http://www.attachmentdisordermaryland.com/intro.htm</a>                                                                                             |
| Spinal Cord Injuries       | Very Rare                              | 20         | <a href="http://webappa.cdc.gov/cgi-bin/broker.exe">http://webappa.cdc.gov/cgi-bin/broker.exe</a>                                                                                                                 |
| Meningocele                | Rare                                   | 20         | <a href="http://www.spinabifida.net/meningocele-vs-myelomeningocele.html">http://www.spinabifida.net/meningocele-vs-myelomeningocele.html</a>                                                                     |
| Arthrogryposis             | Rare                                   | 20         | <a href="http://www.ncbi.nlm.nih.gov/pmc/articles/PMC2698792/">http://www.ncbi.nlm.nih.gov/pmc/articles/PMC2698792/</a>                                                                                           |
| Encephalopathy, Congenital | Unknown                                | 19         | <a href="http://www.cdc.gov/concussion/HeadsUp/clinicians/resource_center/complications_of_concussion.html">http://www.cdc.gov/concussion/HeadsUp/clinicians/resource_center/complications_of_concussion.html</a> |
| Peroxisomal Disorders      | Very Rare                              | 19         | <a href="http://en.wikipedia.org/wiki/Peroxisomal_disorder">http://en.wikipedia.org/wiki/Peroxisomal_disorder</a>                                                                                                 |
| Low Birth Weight           | Very Common                            | 19         | <a href="https://www.cdc.gov/nchs/fastats/birthweight.htm">https://www.cdc.gov/nchs/fastats/birthweight.htm</a>                                                                                                   |
| Cytomeglovirus             | Common                                 | 19         | <a href="https://academic.oup.com/cid/article/49/4/522/379745">https://academic.oup.com/cid/article/49/4/522/379745</a>                                                                                           |
| Rubenstein-Taybi Syndrome  | Very Rare                              | 19         | <a href="https://www.rarediseases.org/rare-disease-information/rare-diseases/byID/461/viewFullReport">https://www.rarediseases.org/rare-disease-information/rare-diseases/byID/461/viewFullReport</a>             |
| Angelman Syndrome          | Very Rare                              | 19         | <a href="http://ghr.nlm.nih.gov/condition/angelman-syndrome">http://ghr.nlm.nih.gov/condition/angelman-syndrome</a>                                                                                               |
| Cri-du-chat Syndrome       | Very Rare                              | 18         | <a href="http://www.ncbi.nlm.nih.gov/pmc/articles/PMC1574300/">http://www.ncbi.nlm.nih.gov/pmc/articles/PMC1574300/</a>                                                                                           |
| Herpes Simplex Virus       | Very Rare                              | 17         | <a href="http://www.ncbi.nlm.nih.gov/pmc/articles/PMC321459/">http://www.ncbi.nlm.nih.gov/pmc/articles/PMC321459/</a>                                                                                             |
| Inborn Error of Metabolism | Very Common                            | 17         | <a href="http://press.endocrine.org/doi/full/10.1210/jc.2008-2291">http://press.endocrine.org/doi/full/10.1210/jc.2008-2291</a>                                                                                   |
| Failure to Thrive          | Very Common                            | 17         | <a href="http://ije.oxfordjournals.org/content/33/4/847.full">http://ije.oxfordjournals.org/content/33/4/847.full</a>                                                                                             |
| Anomalies of the Brain     | Unknown                                | 17         | *                                                                                                                                                                                                                 |

| Condition                   | Estimated relative prevalence category | No. states | Reference                                                                                                                                                                                                   |
|-----------------------------|----------------------------------------|------------|-------------------------------------------------------------------------------------------------------------------------------------------------------------------------------------------------------------|
| DeLange Syndrome            | Very Rare                              | 17         | <a href="http://www.rarediseases.org/rare-disease-information/rare-diseases/byID/30/viewFullReport">http://www.rarediseases.org/rare-disease-information/rare-diseases/byID/30/viewFullReport</a>           |
| Hypothyroidism              | Rare                                   | 16         | <a href="http://pediatrics.aappublications.org/content/125/Supplement_2/S31.long">http://pediatrics.aappublications.org/content/125/Supplement_2/S31.long</a>                                               |
| Galactosemia                | Very Rare                              | 16         | <a href="http://ghr.nlm.nih.gov/condition=galactosemia">http://ghr.nlm.nih.gov/condition=galactosemia</a>                                                                                                   |
| Miller-Dieker Syndrome      | Very Rare                              | 16         | <a href="http://onlinelibrary.wiley.com/doi/10.1111/j.0013-9580.2005.461010.x/epdf">http://onlinelibrary.wiley.com/doi/10.1111/j.0013-9580.2005.461010.x/epdf</a>                                           |
| Microdactyly                | Very Rare                              | 16         | <a href="https://www.researchgate.net/profile/Muhammad_Adil_Khan2/publication/228071551_Macroductyly_-_">https://www.researchgate.net/profile/Muhammad_Adil_Khan2/publication/228071551_Macroductyly_-_</a> |
| CHARGE Syndrome/Association | Very Rare                              | 16         | <a href="http://ghr.nlm.nih.gov/condition/charge-syndrome">http://ghr.nlm.nih.gov/condition/charge-syndrome</a>                                                                                             |
| Lead Poisoning              | Very Rare                              | 16         | <a href="http://www.cdc.gov/nceh/lead/data/Website_StateConfirmedByYear_1997_2014_10162014.htm">http://www.cdc.gov/nceh/lead/data/Website_StateConfirmedByYear_1997_2014_10162014.htm</a>                   |
| Tracheostomy                | Rare                                   | 16         | <a href="http://pediatrics.aappublications.org/content/131/5/e1491.full#ref-13">http://pediatrics.aappublications.org/content/131/5/e1491.full#ref-13</a>                                                   |
| AIDS                        | Very Rare                              | 15         | <a href="http://www.cdc.gov/hiv/statistics/basics/index.html">http://www.cdc.gov/hiv/statistics/basics/index.html</a>                                                                                       |
| Wilson Disease              | Very Rare                              | 15         | <a href="http://ghr.nlm.nih.gov/condition/wilson-disease">http://ghr.nlm.nih.gov/condition/wilson-disease</a>                                                                                               |
| Treacher-Collins Syndrome   | Very Rare                              | 15         | <a href="http://ghr.nlm.nih.gov/condition/treacher-collins-syndrome">http://ghr.nlm.nih.gov/condition/treacher-collins-syndrome</a>                                                                         |
| Vacter Syndrome             | Very Rare                              | 15         | <a href="https://www.orpha.net/consor/cgi-bin/OC_Exp.php?Expert=887">https://www.orpha.net/consor/cgi-bin/OC_Exp.php?Expert=887</a>                                                                         |
| Myasthenia                  | Very Rare                              | 14         | <a href="http://www.myasthenia.org/healthprofessionals/clinicaloverviewofmg.aspx">http://www.myasthenia.org/healthprofessionals/clinicaloverviewofmg.aspx</a>                                               |
| Muscular Dystrophy          | Rare                                   | 14         | <a href="https://www.cdc.gov/ncbddd/muscular dystrophy/facts.html">https://www.cdc.gov/ncbddd/muscular dystrophy/facts.html</a>                                                                             |
| Microcephaly                | Very Rare                              | 14         | <a href="http://onlinelibrary.wiley.com/doi/10.1111/j.1651-2227.2009.01666.x/abstract">http://onlinelibrary.wiley.com/doi/10.1111/j.1651-2227.2009.01666.x/abstract</a>                                     |
| Williams Syndrome           | Rare                                   | 14         | <a href="http://ghr.nlm.nih.gov/condition/williams-syndrome">http://ghr.nlm.nih.gov/condition/williams-syndrome</a>                                                                                         |

| Condition                 | Estimated relative prevalence category | No. states | Reference                                                                                                                                                                                   |
|---------------------------|----------------------------------------|------------|---------------------------------------------------------------------------------------------------------------------------------------------------------------------------------------------|
| Ventilator Dependent      | Very Rare                              | 14         | <a href="http://pediatrics.aappublications.org/content/early/2013/07/31/peds.2012-2990.full.pdf">http://pediatrics.aappublications.org/content/early/2013/07/31/peds.2012-2990.full.pdf</a> |
| DiGeorge Syndrome         | Rare                                   | 13         | <a href="http://ghr.nlm.nih.gov/condition/22q112-deletion-syndrome">http://ghr.nlm.nih.gov/condition/22q112-deletion-syndrome</a>                                                           |
| Leukodystrophy            | Very Rare                              | 13         | <a href="http://ghr.nlm.nih.gov/condition/metachromatic-leukodystrophy">http://ghr.nlm.nih.gov/condition/metachromatic-leukodystrophy</a>                                                   |
| Myotubular Myopathy       | Very Rare                              | 13         | <a href="https://rarediseases.org/rare-diseases/x-linked-myotubular-myopathy/">https://rarediseases.org/rare-diseases/x-linked-myotubular-myopathy/</a>                                     |
| Neural Tube Defect        | Rare                                   | 13         | <a href="http://www.cdc.gov/mmwr/preview/mmwrhtml/mm5317a3.htm">http://www.cdc.gov/mmwr/preview/mmwrhtml/mm5317a3.htm</a>                                                                   |
| Tetralogy of Fallot       | Rare                                   | 13         | <a href="http://www.cdc.gov/ncbddd/heartdefects/TetralogyOfFallot.html">http://www.cdc.gov/ncbddd/heartdefects/TetralogyOfFallot.html</a>                                                   |
| Phocomelia                | Very Rare                              | 13         | <a href="https://www.ncbi.nlm.nih.gov/pubmed/22002800">https://www.ncbi.nlm.nih.gov/pubmed/22002800</a>                                                                                     |
| Marfan Syndrome           | Rare                                   | 12         | <a href="http://ghr.nlm.nih.gov/condition/marfan-syndrome">http://ghr.nlm.nih.gov/condition/marfan-syndrome</a>                                                                             |
| Turner Syndrome           | Very Rare                              | 12         | <a href="http://press.endocrine.org/doi/full/10.1210/jc.2012-1245">http://press.endocrine.org/doi/full/10.1210/jc.2012-1245</a>                                                             |
| Klinefelter Syndrome      | Common                                 | 11         | <a href="http://www.nichd.nih.gov/health/topics/klinefelter/conditioninfo/Pages/risk.aspx">http://www.nichd.nih.gov/health/topics/klinefelter/conditioninfo/Pages/risk.aspx</a>             |
| Propionic Acidemia        | Very Rare                              | 10         | <a href="https://ghr.nlm.nih.gov/condition/propionic-acidemia#statistics">https://ghr.nlm.nih.gov/condition/propionic-acidemia#statistics</a>                                               |
| Hurler-Scheie             | Very Rare                              | 10         | <a href="https://www.orpha.net/consor/cgi-bin/OC_Exp.php?Lng=en&amp;Expert=93476">https://www.orpha.net/consor/cgi-bin/OC_Exp.php?Lng=en&amp;Expert=93476</a>                               |
| Cystic Fibrosis           | Rare                                   | 10         | <a href="http://www.cdc.gov/mmwr/preview/mmwrhtml/rr5313a1.htm">http://www.cdc.gov/mmwr/preview/mmwrhtml/rr5313a1.htm</a>                                                                   |
| Infantile Spasms          | Rare                                   | 10         | <a href="https://www.ncbi.nlm.nih.gov/pmc/articles/PMC2829573/">https://www.ncbi.nlm.nih.gov/pmc/articles/PMC2829573/</a>                                                                   |
| Toxoplasmosis, Congenital | Very Rare                              | 10         | <a href="https://www.orpha.net/consor/cgi-bin/OC_Exp.php?Lng=GB&amp;Expert=858">https://www.orpha.net/consor/cgi-bin/OC_Exp.php?Lng=GB&amp;Expert=858</a>                                   |
| Encephalopathy, Hypoxic   | Common                                 | 10         | <a href="https://www.ncbi.nlm.nih.gov/pubmed/20554402">https://www.ncbi.nlm.nih.gov/pubmed/20554402</a>                                                                                     |
| Encephalocele             | Very Rare                              | 10         | <a href="http://www.cdc.gov/ncbddd/birthdefects/features/birthdefects-keyfindings.html">http://www.cdc.gov/ncbddd/birthdefects/features/birthdefects-keyfindings.html</a>                   |
| Spina Bifida              | Rare                                   | 10         | <a href="http://www.cdc.gov/ncbddd/birthdefects/data.html">http://www.cdc.gov/ncbddd/birthdefects/data.html</a>                                                                             |

| Condition                                | Estimated relative prevalence category | No. states | Reference                                                                                                                                                                                                                                                                     |
|------------------------------------------|----------------------------------------|------------|-------------------------------------------------------------------------------------------------------------------------------------------------------------------------------------------------------------------------------------------------------------------------------|
| Persistent Hyperplastic Primary Vitreous | Unknown                                | 10         | <a href="http://www.institut-vision.org/en/health/28-diseases/98-persistent-hyperplastic-primary-vitreous.html?showall=1&amp;limitstart=">http://www.institut-vision.org/en/health/28-diseases/98-persistent-hyperplastic-primary-vitreous.html?showall=1&amp;limitstart=</a> |
| Russell-Silver Syndrome                  | Very Rare                              | 10         | <a href="https://ghr.nlm.nih.gov/condition/russell-silver-syndrome">https://ghr.nlm.nih.gov/condition/russell-silver-syndrome</a>                                                                                                                                             |

Notes: \* = Due to vague and overly broad terminology without clear classification, no reference is provided for Anomalies of the Brain; Very Rare  $\leq 1/10,000$  cases; Rare =  $1/9,999$  to  $1/1,000$  cases; Common =  $1/999$  to  $1/100$  cases; Very Common  $\geq 1/99$  cases
